# Supplementary material for: Cardiac Fibroblasts Mediate a Sexually Dimorphic Fibrotic Response to β‐Adrenergic Stimulation
Source: PubMed Central journal article supplement — J Am Heart Assoc. 2021 May 15;10(11):e018876. doi: 10.1161/JAHA.120.018876 (PMC8483546; doi:10.1161/jaha.120.018876), 2021-05-15
Supplement: JAH3-10-e018876-s001.pdf [file JAH3-10-e018876-s001.pdf]

# **SUPPLEMENTAL MATERIAL**

## Data S1.

### Supplemental Methods

#### MATLAB script for automatic fibrotic area detection in picosirius red staining

```
clear %clear workspace
clc %clear command window

% Directory for the picosirius red images (green channel)
filenames = dir('*.tif');

Resultlist = {'Filename','Area [pix]','Area fibrotic','% Fibrotic [%]'};
hl = 1; %headerlines in results list for output

for q = 1:numel(filenames)
    % Load image
    I = imread(filenames(q).name);
    Resultlist{q+hl,1} = filenames(q,1).name;

    if size(I,3) == 3 %Check if RGB image
        % If RGB image, take blue "3" channel. Change to "1" for red or "2"
        % for green.
        I = I(:,:,2);
    end

    % Takes the image complement
    I = imcomplement(I);

    % Remove background and fill in holes. May need to modify background
    % threshold number for imaging experiment (i.e., 55000, and 60)
    imgOriginal = I;
    img2 = I > 55000;
    deletesize = 300;
    img3 = bwareaopen(img2, deletesize);
    se = strel('disk',60);
    img3 = imclose(img3,se);
    [i,j] = size(img3);

    % Total cross-sectional area of heart
    sTotal = sum(sum(img3));
    Resultlist{q+hl,2} = sTotal;

    % Set background into original image
    for a = 1:i;
        for b = 1:j;
            if img3(a,b) == 0;
                I(a,b) = 0;
            end
        end
    end

    %Image average smoothing by (i)th times. Set to 4 to smoothen out
    %noise.
    I2 = I;
```

```

for i = 1:4
    h = fspecial('average');
    I2 = imfilter(I2,h);
end

%Hole-filling algorithm to fill in any hole (below threshold)regions in
%nucleus
I4 = imfill(I2, 'holes');

% Extract the nucleus from the original image to a black background
[I5] = ExtractImage(I,I4);
I5 = uint16(I5);

%Intensity redistribution for I5
A = max(max(I5));
B = double(I5);
C = double(A);
I5 = (B/C)*65535;
I5 = uint16(I5);

% Set threshold for fibrotic area determination
fibrotic = 1.05;
thresh = max(max(I5))/fibrotic;
bg = bwperim(img3);
se2 = strel('disk',4);
bg = imdilate(bg,se2);
colI = I5 > thresh;
colI = colI - bg;
colI(colI < 0) = 0;
imshow(colI)
pTotal = sum(sum(colI));
Resultlist{q+hl,3} = pTotal;
PerFibrotic = (pTotal/sTotal)*100

Resultlist{q+hl,4} = PerFibrotic;

end

```

**Table S1. Echocardiographic Data for Male and Female, Vehicle and ISO-treated.**

|                | Females |          | Males   |               |               |               |
|----------------|---------|----------|---------|---------------|---------------|---------------|
|                | Vehicle | ISO      | Vehicle | ISO (1 mg/kg) | ISO (2 mg/kg) | ISO (4 mg/kg) |
|                | n=6     | n=10     | n=8     | n=7           | n=3           | n=3           |
| LVAW; d (cm)   | 0.11    | 0.169    | 0.128   | 0.16          | 0.141         | 0.147         |
| SD             | 0.008   | 0.015    | 0.014   | 0.017         | 0.01          | 0.02          |
| P              |         | 6.30E-07 |         | 0.00042       | 0.05144       | 0.03455       |
| LVID; d (cm)   | 0.726   | 0.675    | 0.798   | 0.713         | 0.711         | 0.652         |
| SD             | 0.058   | 0.031    | 0.022   | 0.061         | 0.059         | 0.056         |
| P              |         | 0.023    |         | 0.0042        | 0.0132        | 0.0007        |
| LVPW; d (cm)   | 0.125   | 0.166    | 0.134   | 0.166         | 0.159         | 0.15          |
| SD             | 0.011   | 0.017    | 0.006   | 0.012         | 0.022         | 0.015         |
| P              |         | 0.00012  |         | 6.25E-06      | 0.0046        | 0.0108        |
| LVAW; s (cm)   | 0.183   | 0.264    | 0.204   | 0.276         | 0.274         | 0.267         |
| SD             | 0.021   | 0.034    | 0.019   | 0.038         | 0.051         | 0.038         |
| P              |         | 9.60E-05 |         | 0.0004        | 0.00583       | 0.00514       |
| LVID; s (cm)   | 0.418   | 0.246    | 0.447   | 0.211         | 0.254         | 0.169         |
| SD             | 0.052   | 0.06     | 0.066   | 0.054         | 0.118         | 0.085         |
| P              |         | 3.80E-05 |         | 2.40E-06      | 0.00324       | 0.00013       |
| LVPW; s (cm)   | 0.237   | 0.327    | 0.254   | 0.332         | 0.289         | 0.333         |
| SD             | 0.029   | 0.038    | 0.036   | 0.032         | 0.044         | 0.043         |
| P              |         | 0.00013  |         | 0.00029       | 0.095         | 0.00533       |
| LV Vol; d (µl) | 278.87  | 235.957  | 343.96  | 268.184       | 266.089       | 218.751       |
| SD             | 50.467  | 24.85    | 21.462  | 53.434        | 49.585        | 42.591        |
| P              |         | 0.0229   |         | 0.0047        | 0.014821      | 0.000983      |
| LV Vol; s (µl) | 79.025  | 23.492   | 93.799  | 16.078        | 29.074        | 10.955        |
| SD             | 22.81   | 12.926   | 33.627  | 9.922         | 31.829        | 13.028        |
| P              |         | 2.00E-05 |         | 2.40E-05      | 0.00858       | 0.00133       |
| EF (%)         | 72.028  | 90.159   | 72.896  | 94.113        | 89.994        | 95.529        |
| SD             | 4.442   | 4.991    | 8.776   | 3.5           | 9.5           | 4.649         |
| P              |         | 3.54E-06 |         | 1.90E-05      | 0.009164      | 0.001074      |
| FS (%)         | 42.58   | 63.571   | 44.006  | 70.49         | 64.773        | 74.616        |
| SD             | 3.643   | 8.369    | 7.33    | 6.75          | 13.744        | 10.688        |
| P              |         | 3.43E-05 |         | 3.10E-06      | 0.00415       | 0.000179      |
| HR (bpm)       | 365.78  | 425.104  | 355.481 | 427.112       | 440.773       | 462.35        |
| SD             | 44.889  | 15.05    | 25.286  | 26.856        | 46.88         | 23.741        |
| P              |         | 0.0013   |         | 0.0001296     | 0.0023        | 0.00014758    |

Unpaired student's t-test applied comparing variable with vehicle in all cases.

**Table S2. Echocardiographic Data for OVX females and CAS males.**

|                | OVX Females |               | CAS Males |               |
|----------------|-------------|---------------|-----------|---------------|
|                | Vehicle     | ISO (4 mg/kg) | Vehicle   | ISO (4 mg/kg) |
|                | n=7         | n=6           | n=8       | n=9           |
| LVAW; d (cm)   | 0.119       | 0.175         | 0.12      | 0.161         |
| SD             | 0.001       | 0.015         | 0.002     | 0.015         |
| P              |             | 4.80E-07      |           | 9.40E-07      |
| LVID; d (cm)   | 0.72        | 0.691         | 0.744     | 0.705         |
| SD             | 0.033       | 0.044         | 0.053     | 0.06          |
| P              |             | 0.1001        |           | 0.09266       |
| LVPW; d (cm)   | 0.12        | 0.161         | 0.12      | 0.159         |
| SD             | 0.002       | 0.007         | 0.001     | 0.014         |
| P              |             | 8.52E-09      |           | 5.72E-07      |
| LVAW; s (cm)   | 0.186       | 0.249         | 0.188     | 0.266         |
| SD             | 0.018       | 0.041         | 0.012     | 0.023         |
| P              |             | 0.00179       |           | 1.60E-07      |
| LVID; s (cm)   | 0.393       | 0.319         | 0.381     | 0.262         |
| SD             | 0.062       | 0.088         | 0.082     | 0.056         |
| P              |             | 0.05228       |           | 0.0015        |
| LVPW; s (cm)   | 0.193       | 0.244         | 0.193     | 0.269         |
| SD             | 0.01        | 0.026         | 0.013     | 0.034         |
| P              |             | 0.00023       |           | 1.40E-05      |
| LV Vol; d (µl) | 273.022     | 249.297       | 294.352   | 262.029       |
| SD             | 28.801      | 35.704        | 47.105    | 51.403        |
| P              |             | 0.1056        |           | 0.0992        |
| LV Vol; s (µl) | 69.144      | 44.884        | 66.141    | 26.798        |
| SD             | 23.521      | 29.366        | 30.568    | 13.202        |
| P              |             | 0.06302       |           | 0.00155       |
| EF (%)         | 74.597      | 82.631        | 78.275    | 90.218        |
| SD             | 9.005       | 9.56          | 7.685     | 3.337         |
| P              |             | 0.0736        |           | 0.000351      |
| FS (%)         | 45.457      | 54.097        | 49.141    | 63.139        |
| SD             | 8.517       | 10.771        | 8.521     | 5.303         |
| P              |             | 0.0671        |           | 0.000454      |
| HR (bpm)       | 315.954     | 376.961       | 367.162   | 411.5         |
| SD             | 29.694      | 42.042        | 34.237    | 46.746        |
| P              |             | 0.0054        |           | 0.027         |

Unpaired student's t-test applied comparing variable with vehicle in all cases.

**Figure S1. Titration for ISO treatment to determine appropriate dose.**

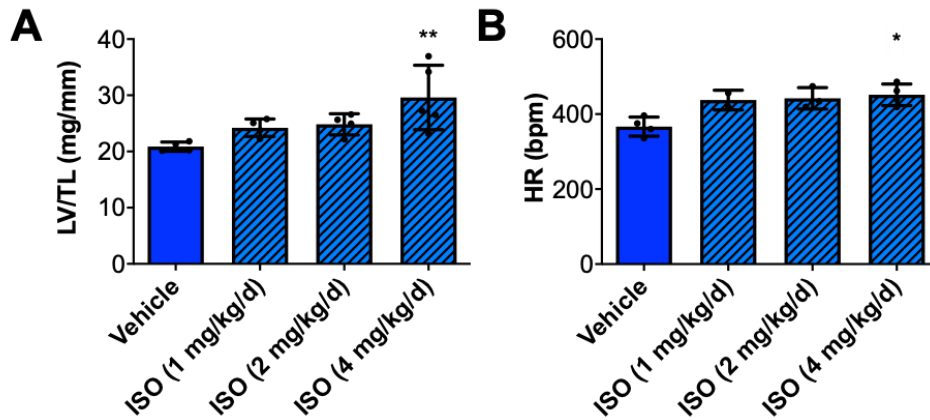

**A)** Cardiac hypertrophy measured by left ventricle to tibia length (LV/TL) in male rats treated with vehicle (n=4), 1 mg/kg/day ISO (n=4), 2 mg/kg/day ISO (n=4), 4 mg/kg/day ISO (n=4). **B)** Heart rate measured by echocardiography in male rats treated with vehicle (n=4), 1 mg/kg/day ISO (n=2), 2 mg/kg/day ISO (n=3), 4 mg/kg/day ISO (n=4). Kruskal-Wallis non-parametric test with Dunn's multiple comparison test applied. \*  $p < 0.05$ , \*\*  $p < 0.01$ . All data reported as  $\pm$  SEM.

**Figure S2. Percent survival of all male and female rats treated with ISO (4 mg/kg/day).**

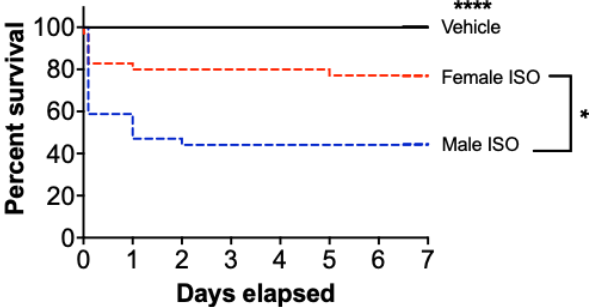

Male vehicle n=29, Male ISO n=93, Female vehicle n=33, Female ISO n=60. Gehan-Breslow-Wilcoxon method applied. \* p<0.05, \*\*\*\* p<0.0001.

**Figure S3.** **A)** Percent survival OVX and CAS animals treated with ISO (4 mg/kg/day). CAS vehicle n=8, CAS ISO n=22, OVX vehicle n=8, OVX ISO n=22. Gehan-Breslow-Wilcoxon method applied. **B)** Percent survival male and female animals treated with ISO (4 mg/kg/day) that were either intact or gonadectimized. Intact male n=34, CAS male n=22, intact female n=35, OVX female n=22. Gehan-Breslow-Wilcoxon method applied. \* p<0.05, \*\* p<0.01.

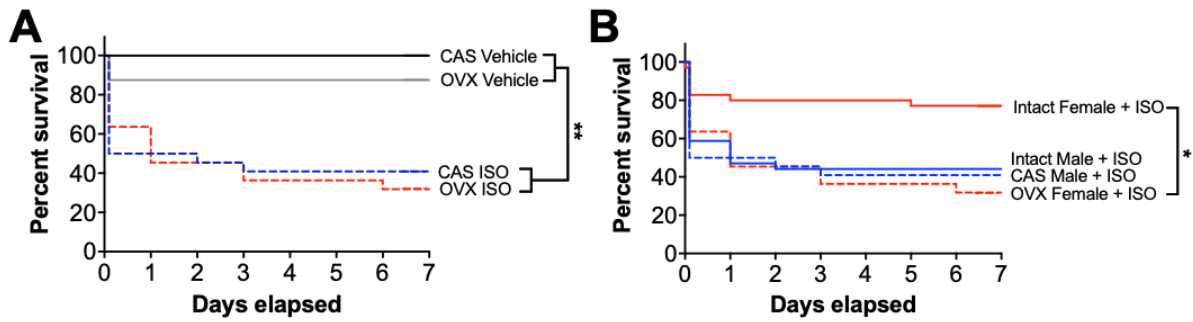



**Figure S4. Gene expression of fibroblast and myofibroblast markers in CFs treated with vehicle or ISO.**

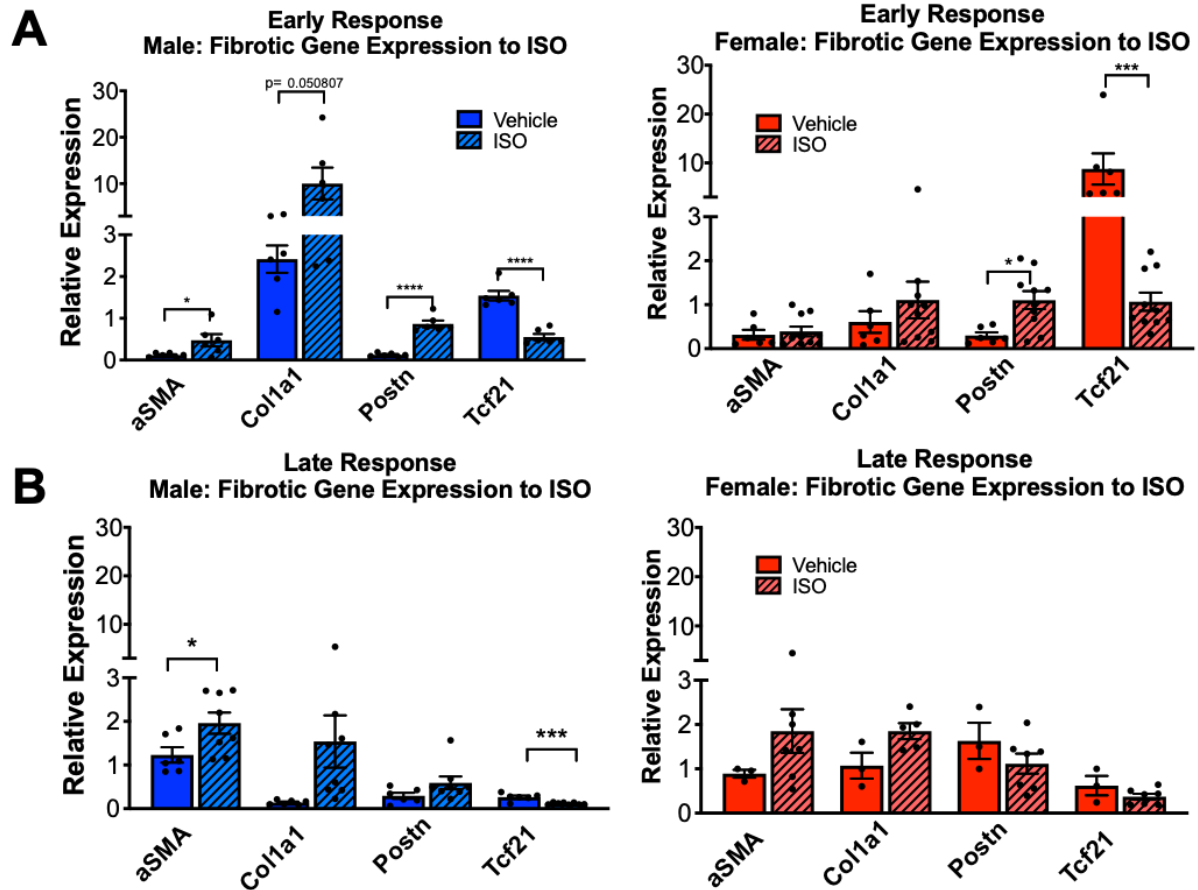

**A)** CFs from 3-day ISO-treated or vehicle-treated male (blue) or female (red) rats.  $\alpha$ SMA, Col1a1, and Postn, and Tcf21 gene expression (normalized to TBP) was measured by qRT-PCR. Male Vehicle n = 6, Male ISO = 6. Female Vehicle n = 6, Female ISO n = 10. Unpaired student's t-test applied. **B)** CFs from 7-day ISO-treated or vehicle-treated male (blue) or female (red) rats.  $\alpha$ SMA, Col1a1, and Postn, and Tcf21 gene expression (normalized to TBP) was measured by qRT-PCR. Male Vehicle n = 6, Male ISO = 8. Female Vehicle n = 3, Female ISO n = 7 (except Col1a1 n = 5). Unpaired student's t-test applied. \* p<0.05, \*\* p<0.01, \*\*\* p<0.001, \*\*\*\* p<0.0001. All data reported as  $\pm$  SEM.
